# Supplementary material for: Mass resolved IR spectroscopy of aniline–water aggregates
Source: Royal Society of Chemistry journal article supplement (doi:10.1039/c6cp04373a), 2016-01-01

**Supporting information for:**

# Mass resolved IR spectroscopy of aniline-water aggregates

*Iker León<sup>†</sup>, Pedro F. Arnáiz, Imanol Usabiaga and José A. Fernández\*.*

Department of Physical Chemistry, Faculty of Science and Technology, University of the Basque Country (UPV/EHU), Barrio Sarriena s/n, 48940 Leioa, Spain.

<sup>†</sup>Present address: Institut de Ciències Fotoniques (ICFO), The Barcelona Institute of Science and Technology, 08860 Castelldefels (Barcelona), Spain.

## AUTHOR INFORMATION

### **Corresponding Author**

\*Dr. José A. Fernández

email: josea.fernandez@ehu.es

Phone: +34946015387

Fax: 34946013500

Web site: <https://sites.google.com/site/gesemupv/>

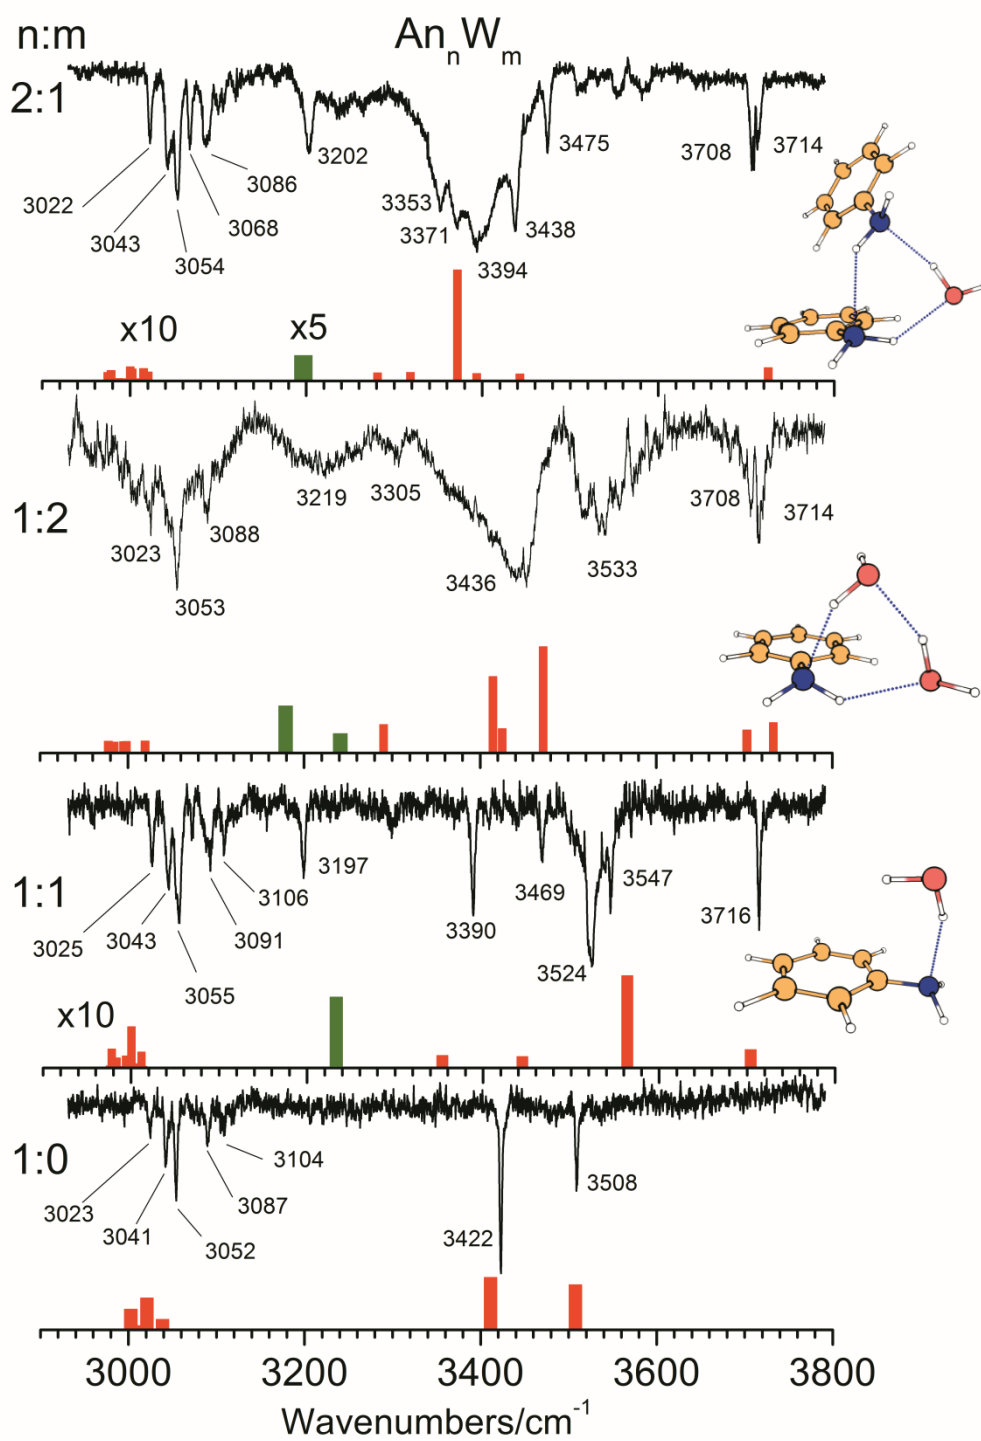

**Figure S1.** Annotated version of Figure 1.

**Figure S2.** Calculated structures of aniline·W<sub>1</sub> at M06-2X/6-311++G(d,p) level, together with their relative stability in kJ/mol. ZPE correction was applied to all the energy values.

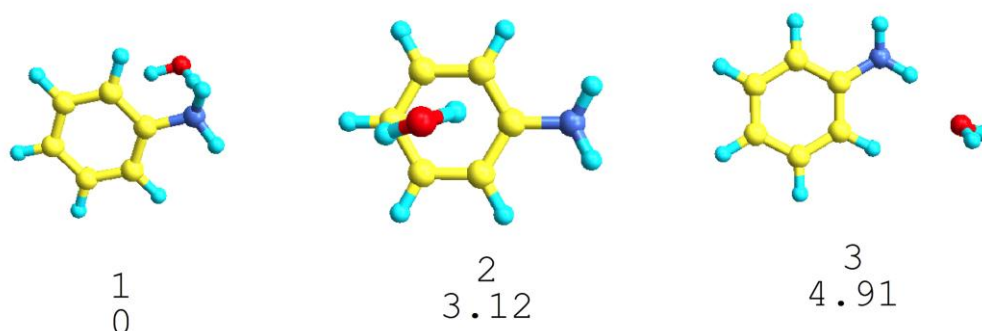

**Table S1.** Calculated structures for aniline·W<sub>1</sub> at M06-2X/6-311++G(d,p) level, together with their relative stability in kJ/mol. ZPE correction was applied to all the energy values.

| <i>Structure</i> | $\Delta E$ (kJ/mol) | $\Delta E_{ZPE}$ (kJ/mol) | $D_0$ (kJ/mol) | $BSSE$ (kJ/mol) |
|------------------|---------------------|---------------------------|----------------|-----------------|
| 1                | 0.00                | 0.00                      | -16.93         | 4.16            |
| 2                | 7.44                | 3.12                      | -14.85         | 3.12            |
| 3                | 6.86                | 4.91                      | -12.87         | 3.31            |

**Figure S3.** Experimental IDIRS of ciclohexanol·W<sub>1</sub> (upper trace) together with the predicted frequencies for each calculated structure at M06-2X/6-311++G(d,p) level. A correction factor of 0.938 was employed.

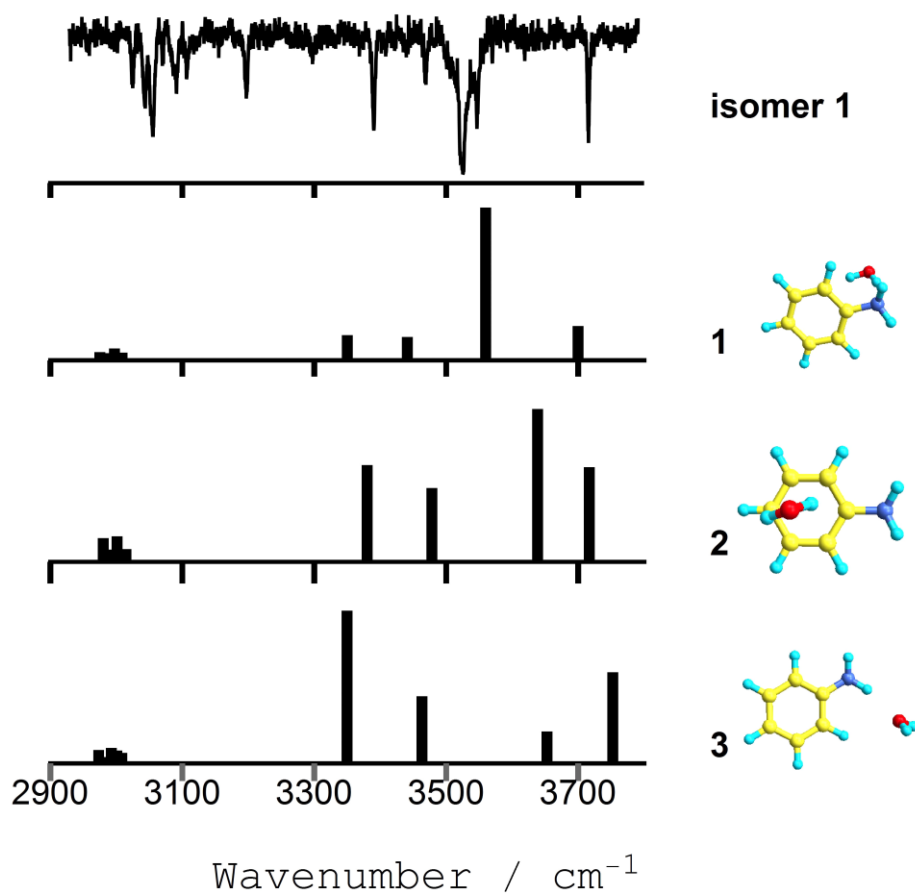

**Figure S4.** Calculated structures of aniline·W<sub>2</sub> at M06-2X/6-311++G(d,p) level, together with their relative stability in kJ/mol. ZPE correction was applied to all the energy values.

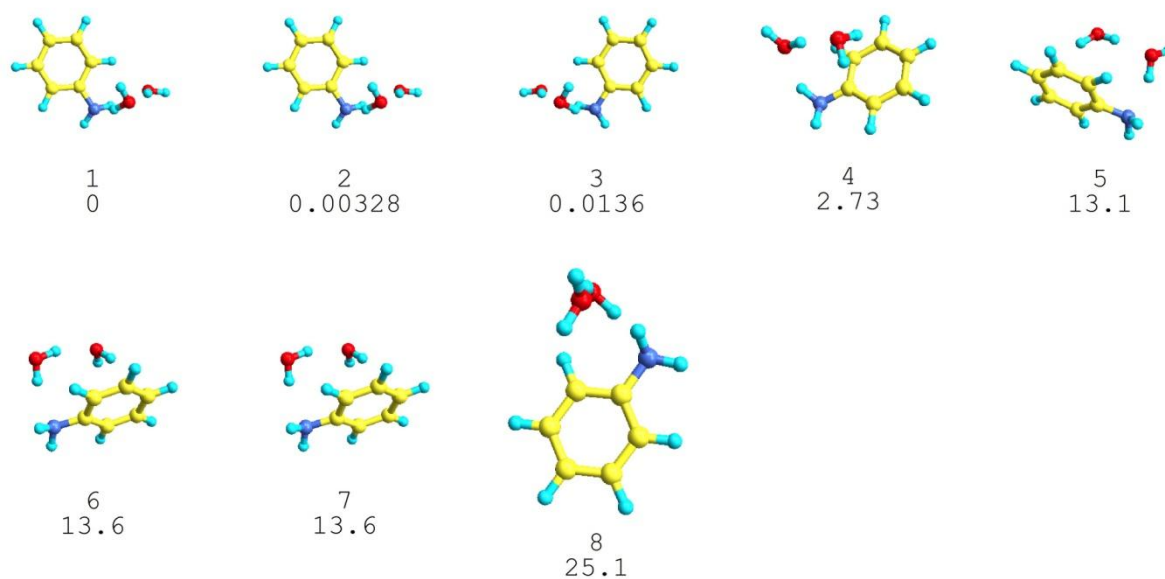

**Table S2.** Calculated structures of ciclohexanol·W<sub>2</sub> at M06-2X/6-311++G(d,p) level, together with their relative stability in kJ/mol. ZPE correction was applied to all the energy values.

| <i>Structure</i> | $\Delta E$ (kJ/mol) | $\Delta E_{ZPE}$ (kJ/mol) |
|------------------|---------------------|---------------------------|
| 1                | 0.00                | 0.00                      |
| 2                | 0.00                | 0.00                      |
| 3                | 0.00                | 0.01                      |
| 4                | 6.52                | 2.73                      |
| 5                | 15.53               | 13.10                     |
| 6                | 16.72               | 13.63                     |
| 7                | 16.72               | 13.64                     |
| 8                | 27.51               | 25.11                     |

**Figure S5.** Experimental IDIRS of aniline·W<sub>2</sub> (upper trace) together with the predicted frequencies for each calculated structure at M06-2X/6-311++G(d,p) level. A correction factor of 0.938 was employed.

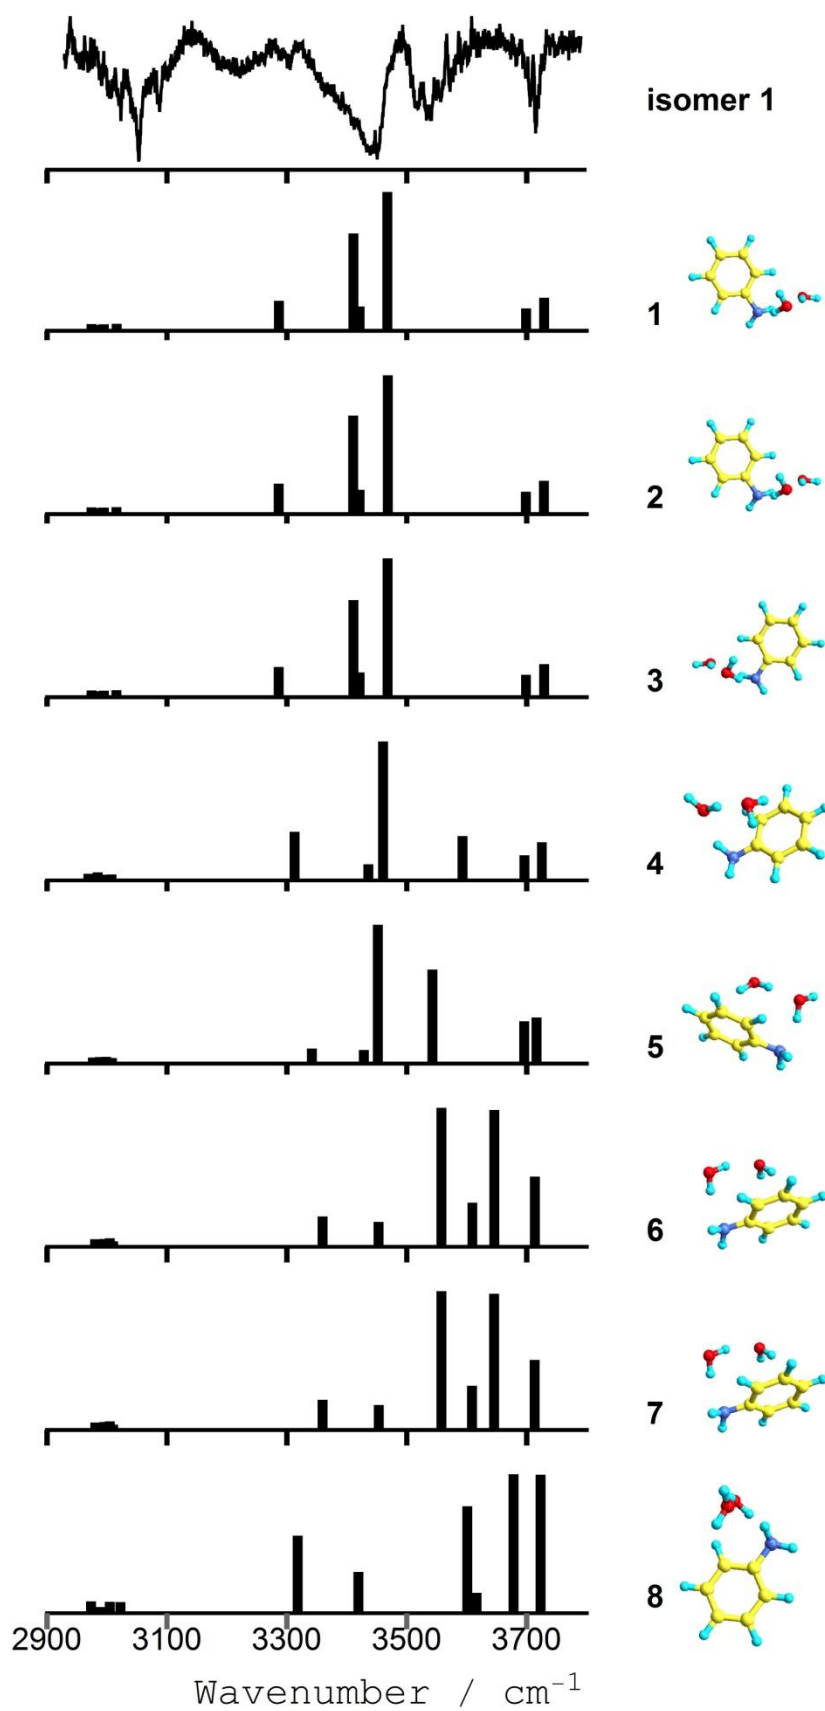

**Figure S6.** Calculated structures of anilina<sub>2</sub>·W<sub>1</sub> at M06-2X/6-311++G(d,p) level, together with their relative stability in kJ/mol. ZPE correction was applied to all the energy values.

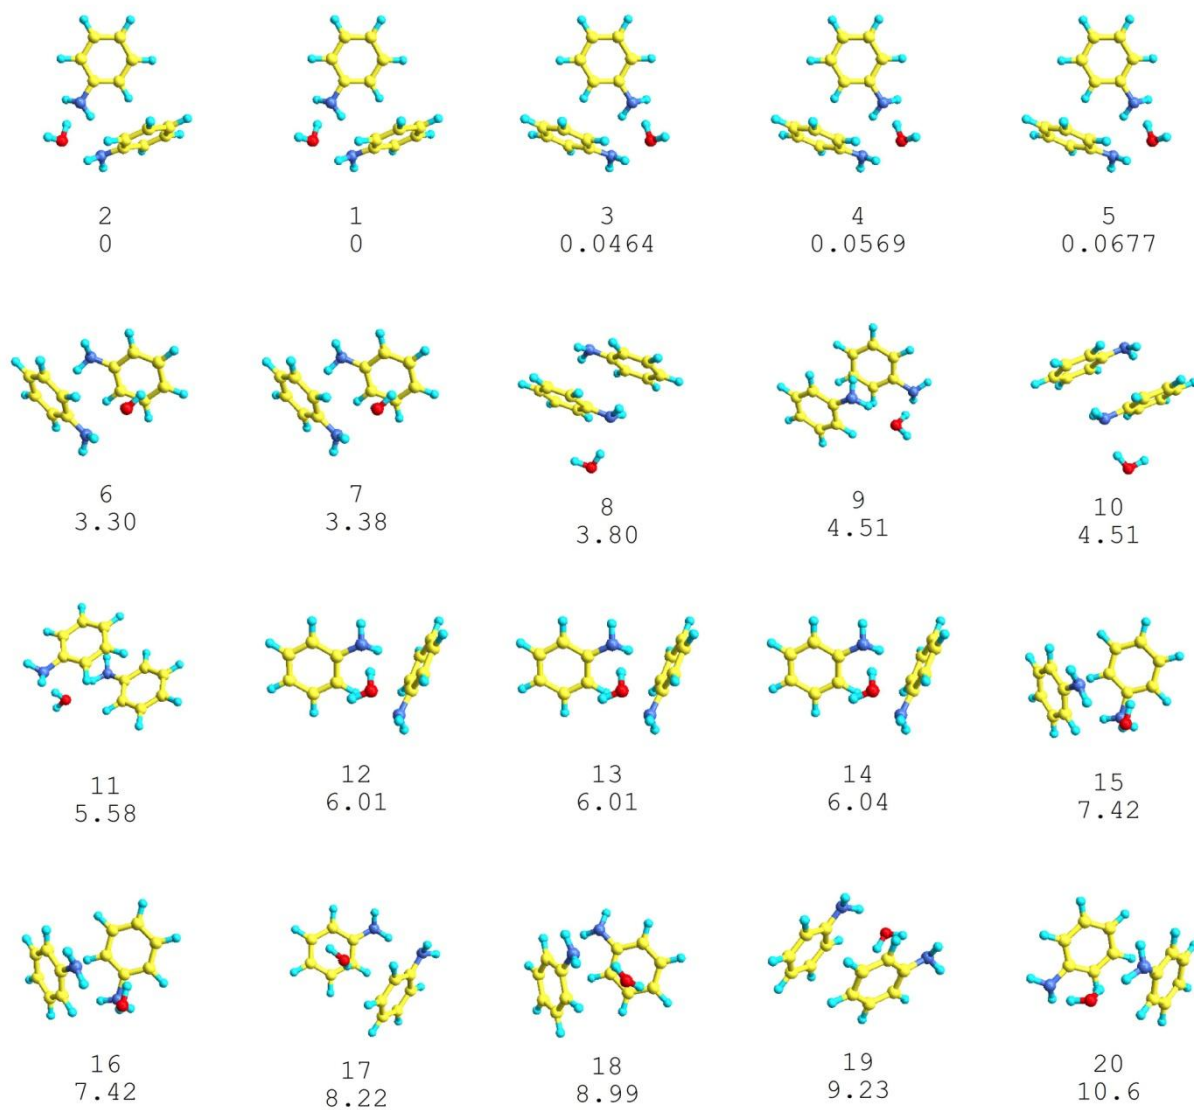

**Figure S6. Cont.**

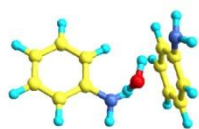

21  
11.6

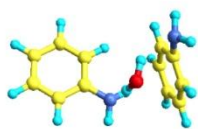

22  
11.6

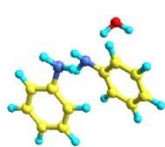

23  
11.7

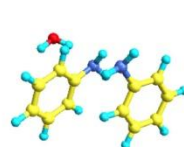

24  
12.1

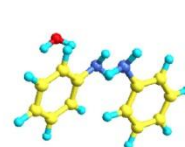

25  
12.1

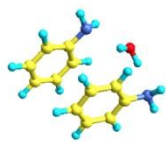

26  
12.3

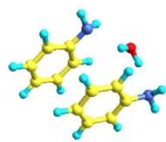

27  
12.3

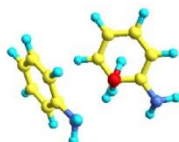

28  
12.9

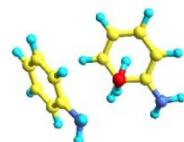

29  
13.0

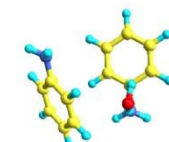

30  
13.5

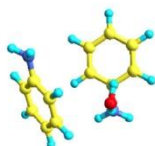

31  
13.6

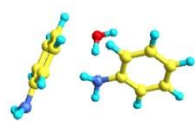

32  
15.1

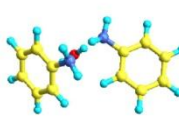

33  
18.0

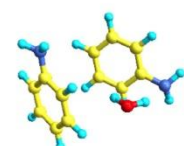

34  
20.6

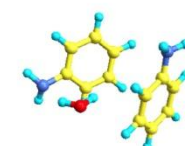

35  
20.6

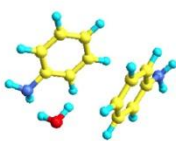

36  
22.4

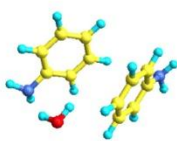

37  
22.5

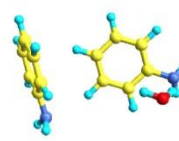

38  
26.4

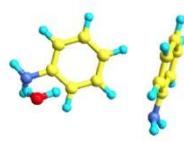

39  
26.4

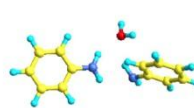

40  
28.5



**Table S3.** Calculated structures of aniline<sub>2</sub>·W<sub>1</sub> at M06-2X/6-311++G(d,p) level, together with their relative stability in kJ/mol. ZPE correction was applied to all the energy values.

| <i>Structure</i> | <i>ΔE (kJ/mol)</i> | <i>ΔE<sub>ZPE</sub> (kJ/mol)</i> |
|------------------|--------------------|----------------------------------|
| 1                | 0.00               | 0.00                             |
| 2                | 0.00               | 0.00                             |
| 3                | 0.00               | 0.05                             |
| 4                | 0.00               | 0.06                             |
| 5                | 0.00               | 0.07                             |
| 6                | 6.48               | 3.30                             |
| 7                | 6.48               | 3.38                             |
| 8                | 7.15               | 3.80                             |
| 9                | 4.80               | 4.50                             |
| 10               | 7.32               | 4.51                             |
| 11               | 4.67               | 5.58                             |
| 12               | 7.89               | 6.01                             |
| 13               | 7.89               | 6.01                             |
| 14               | 7.88               | 6.04                             |
| 15               | 8.11               | 7.42                             |
| 16               | 8.11               | 7.42                             |
| 17               | 12.22              | 8.22                             |
| 18               | 11.58              | 8.99                             |
| 19               | 11.57              | 9.23                             |

**Table S3. Cont.**

| <i>Structure</i> | $\Delta E$<br>(kJ/mol) | $\Delta E_{ZPE}$<br>(kJ/mol) |
|------------------|------------------------|------------------------------|
| 20               | 12.93                  | 10.57                        |
| 21               | 12.47                  | 11.56                        |
| 22               | 12.47                  | 11.57                        |
| 23               | 13.38                  | 11.73                        |
| 24               | 13.74                  | 12.08                        |
| 25               | 13.74                  | 12.09                        |
| 26               | 12.65                  | 12.30                        |
| 27               | 12.65                  | 12.31                        |
| 28               | 16.68                  | 12.92                        |
| 29               | 16.68                  | 12.97                        |
| 30               | 17.27                  | 13.50                        |
| 31               | 17.26                  | 13.60                        |
| 32               | 18.70                  | 15.13                        |
| 33               | 20.43                  | 17.99                        |
| 34               | 23.15                  | 20.63                        |
| 35               | 23.14                  | 20.63                        |
| 36               | 25.37                  | 22.43                        |
| 37               | 25.38                  | 22.46                        |
| 38               | 30.86                  | 26.43                        |
| 39               | 30.86                  | 26.44                        |
| 40               | 30.79                  | 28.51                        |

**Figure S7.** Experimental IDIRS of aniline<sub>2</sub>·W<sub>1</sub> (upper trace) together with the predicted frequencies for each calculated structure at M06-2X/6-311++G(d,p) level. A correction factor of 0.938 was employed.

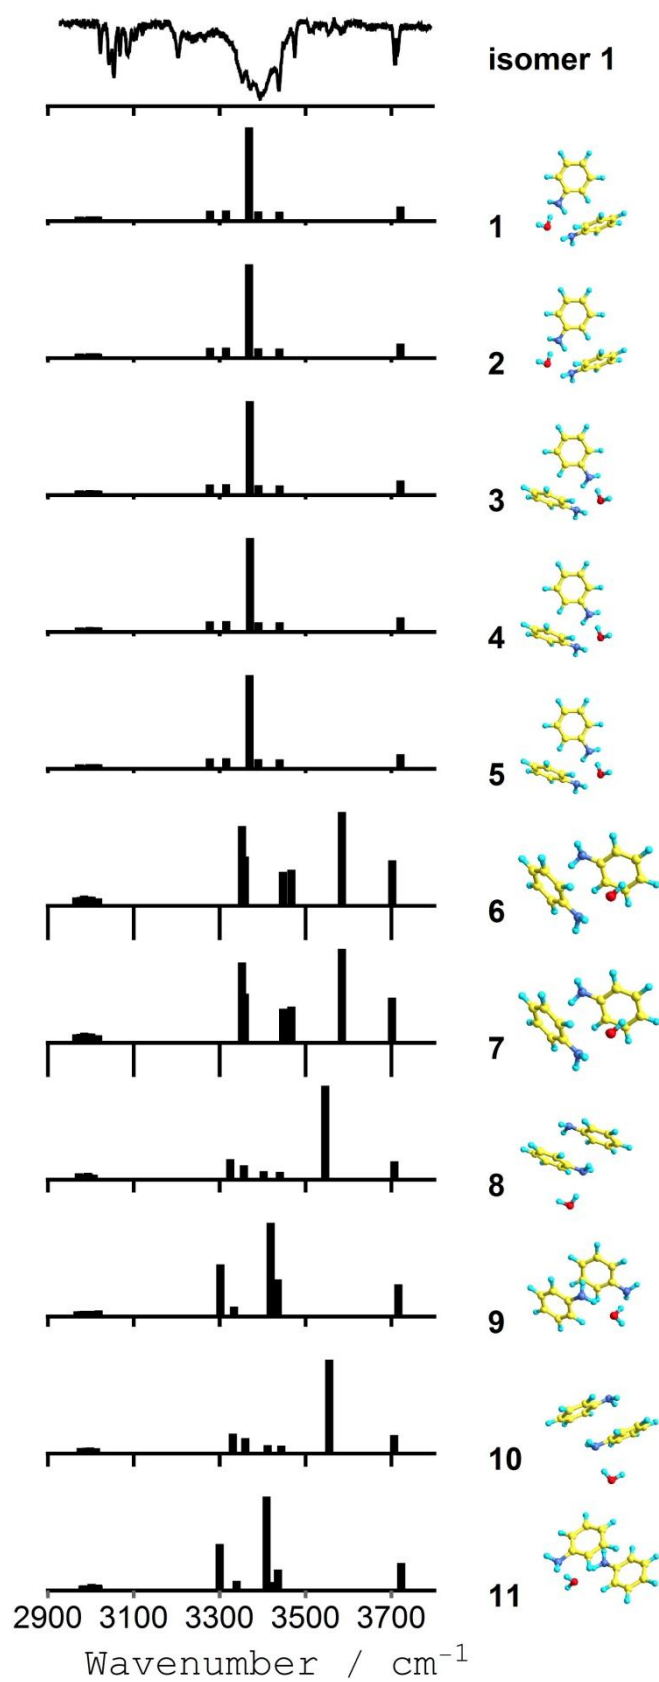

Figure S7. Cont.

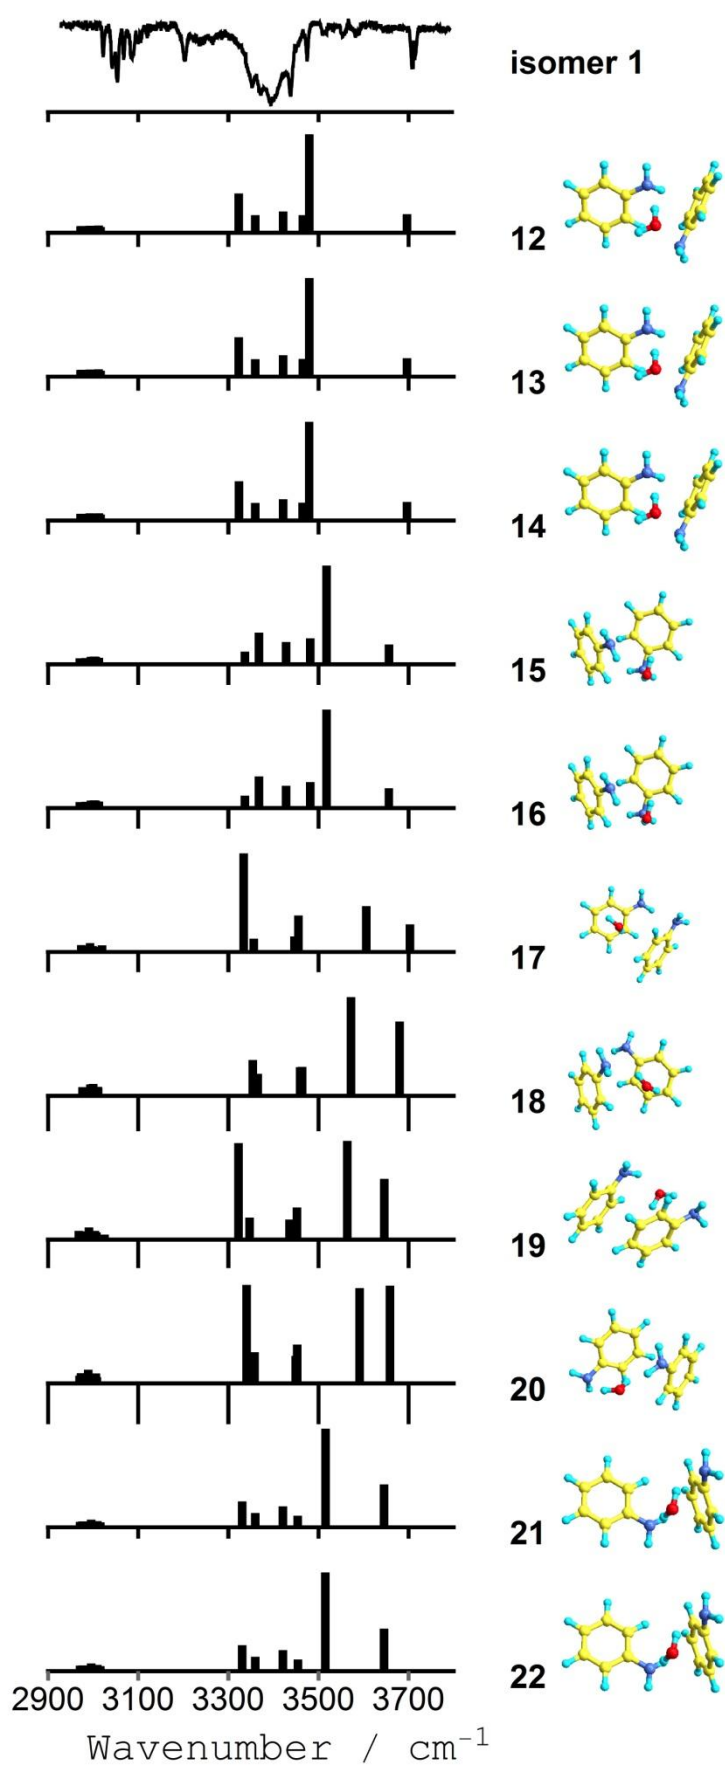

Figure S7. Cont.

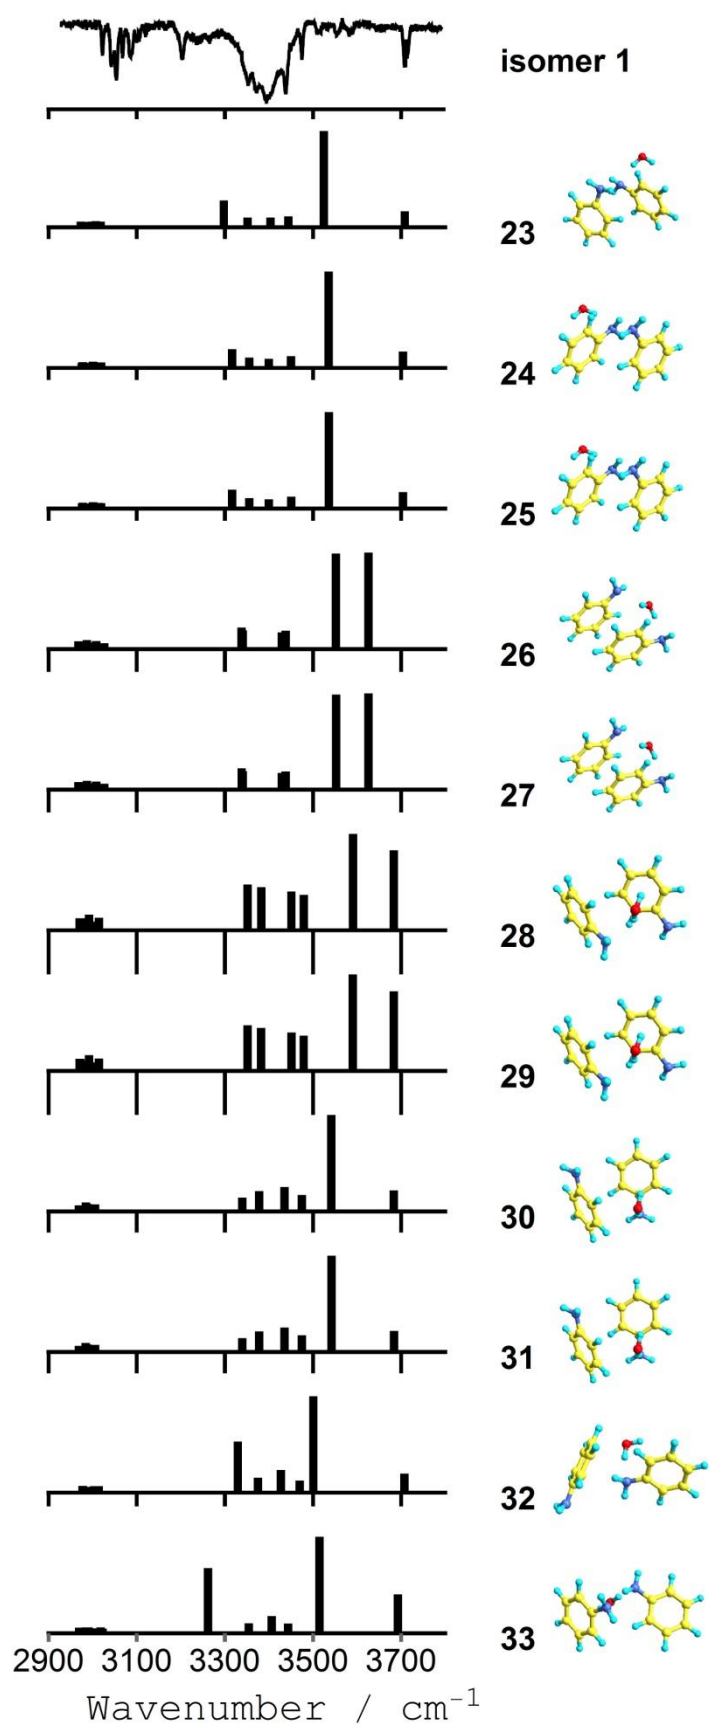

Figure S7. Cont.

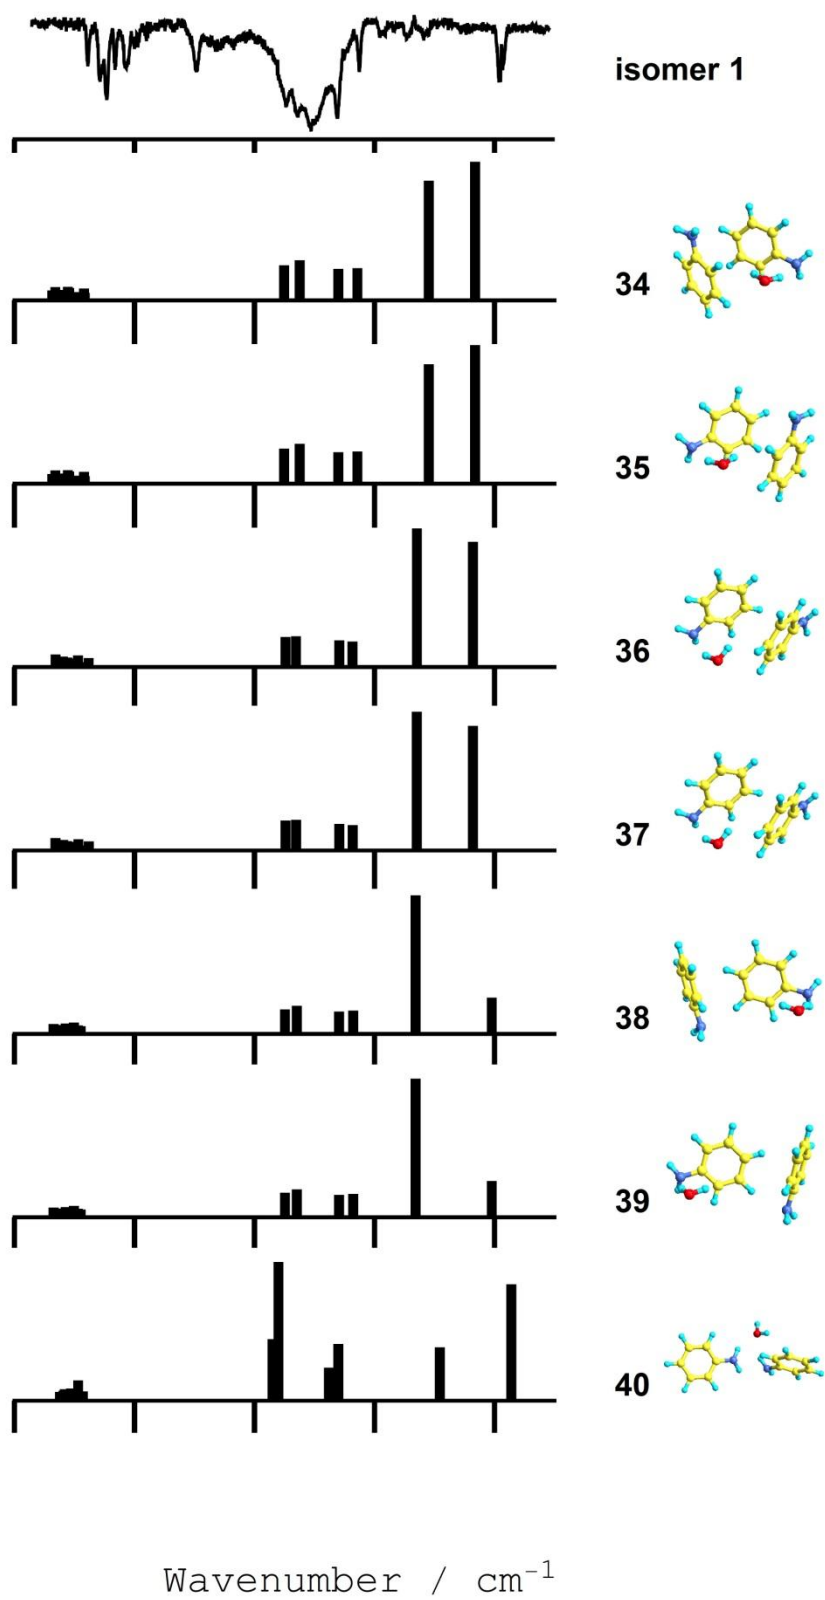

Supplement: c6cp04373a1.pdf [file c6cp04373a1.pdf]
